# Supplementary material for: Preparation, Characterization, and Chemically Modified Date Palm Fiber Waste Biomass for Enhanced Phenol Removal from an Aqueous Environment
Source: MDPI journal article supplement (doi:10.3390/ma16114057), 2023-05-30
Supplement: s1 [file s1]

## Supplementary Materials

# **Preparation, Characterization, and Chemically Modified Date Palm Fiber Waste Biomass for Enhanced Phenol Removal from an Aqueous Environment**

**Nadavala Siva Kumar <sup>1,\*</sup>, Mohammad Asif <sup>1</sup>, Anesh Manjaly Poulose <sup>2</sup>, Ebrahim H. Al-Ghurabi <sup>1</sup>, Shaddad S. Alhamed <sup>1</sup> and Janardhan Reddy Koduru <sup>3</sup>**

<sup>1</sup> Department of Chemical Engineering, King Saud University, P.O. Box 800, Riyadh 11421, Saudi Arabia; masif@ksu.edu.sa (M.A.); ealghurabi@ksu.edu.sa (E.H.A.-G.); shaddadalhamed@gmail.com (S.S.A)

<sup>2</sup> SABIC Polymer Research Centre, Department of Chemical Engineering, King Saud University, P.O. Box 800, Riyadh 11421, Saudi Arabia; apoulose@ksu.edu.sa (A.M.P)

<sup>3</sup> Department of Environmental Engineering, Kwangwoon University, Seoul 01897, Republic of Korea; reddychem@gmail.com (J.R.K)

\* Correspondence: snadavala@ksu.edu.sa, (N.S.K); Tel.: (+966-537228108)

### **Legends to Supplementary Figures**

1. **Figure S1.** Particle size distribution curve of 24 hrs ball-milled date-palm fiber (RDPF) adsorbent.
2. **Figure S2.** Particle size distribution curve of 30 min micro ball-milled date-palm fiber (RDPF) adsorbent.
3. **Figure S3.** N<sub>2</sub> adsorption–desorption isotherms for Raw date-palm fiber adsorbent.
4. **Figure S4.** N<sub>2</sub> adsorption–desorption isotherms for 24 hrs ball-milled date-palm fiber adsorbent.
5. **Figure S5.** N<sub>2</sub> adsorption-desorption isotherms for 30 min Micro ball-milled date-palm fiber adsorbent.
6. **Figure S6.** N<sub>2</sub> adsorption–desorption isotherms of NaOH-chemically modified date palm fiber adsorbent (NaOH–CMDPF).
7. **Figure S7(a–d).** Comparison of experimental and calculated values obtained from the PFO, PSO, intraparticle diffusion and Elovich kinetic models (RDPF).
8. **Figure S8(e–h).** Comparison of experimental and calculated values obtained from the PFO, PSO, intraparticle diffusion and Elovich kinetic models (NaOH–CMDPF).
9. **Figure S9.** Comparison of experimental and theoretical adsorption parameter values of (a) RDPF and (b) NaOH–CMDPF adsorbents from the Langmuir, Freundlich, D-R isotherm models.

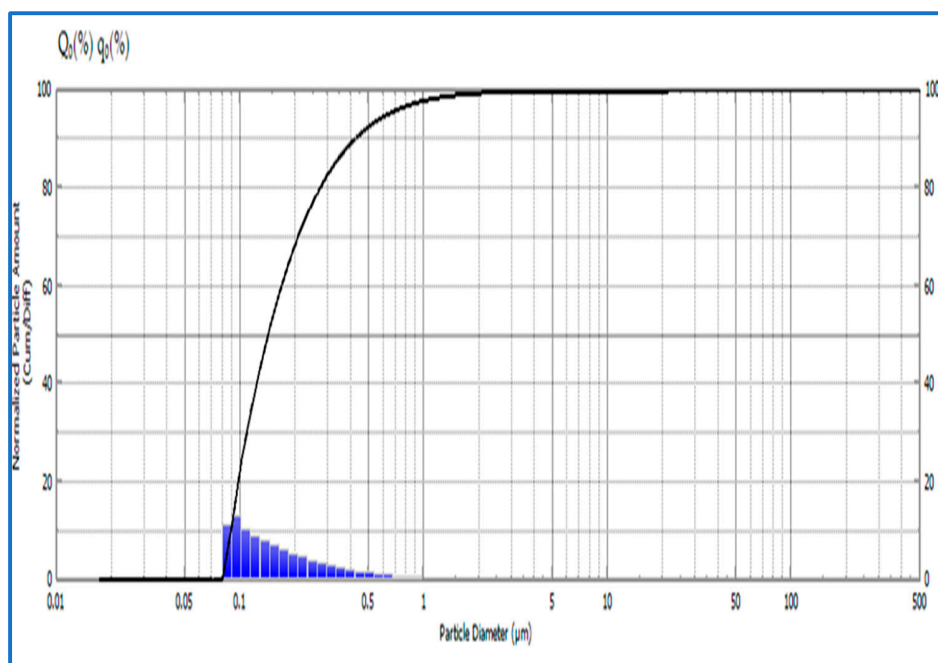

Figure S1.

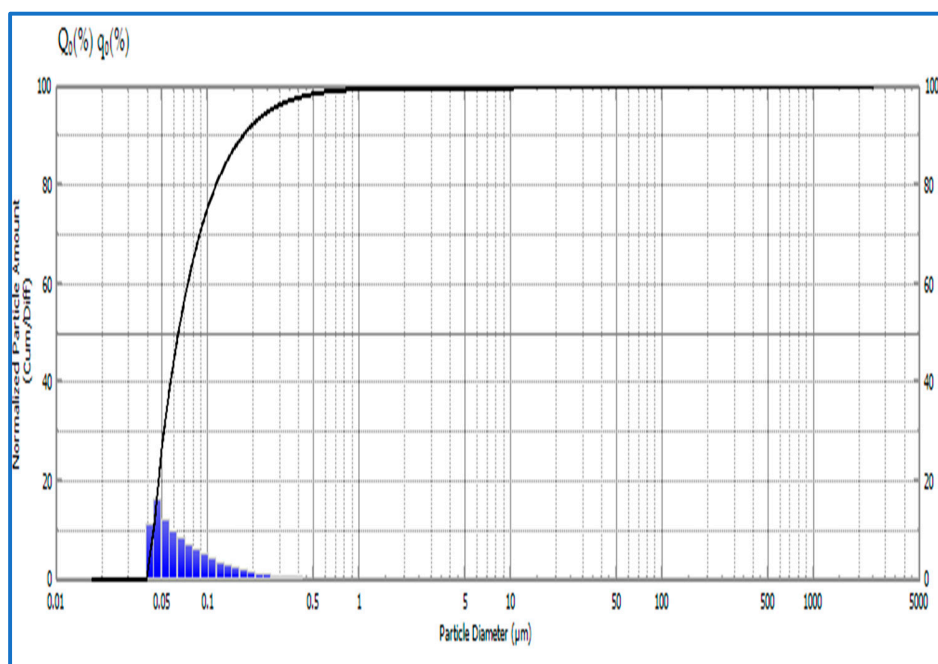

Figure S2.

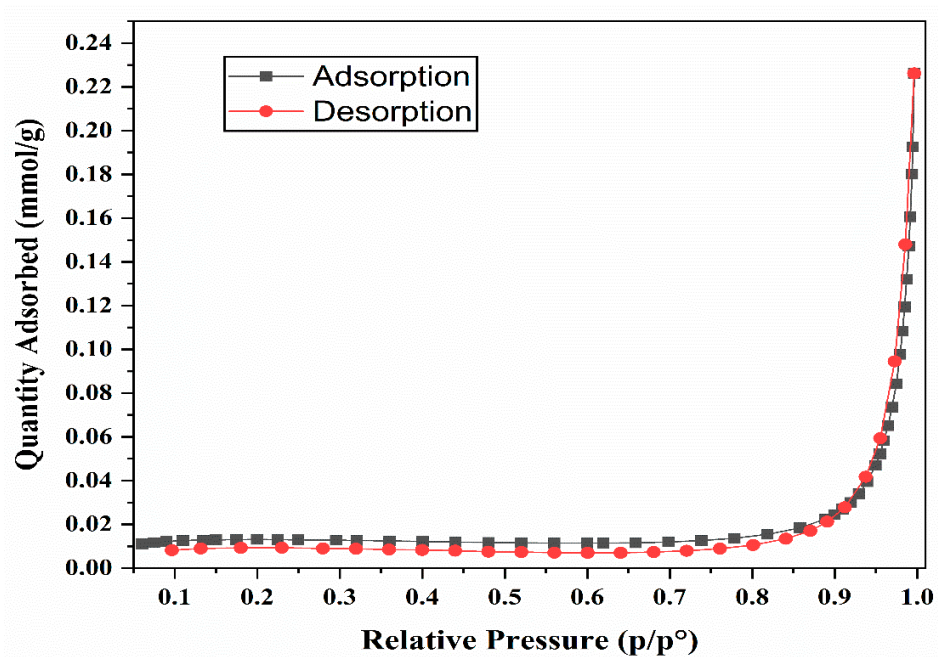

Figure S3.

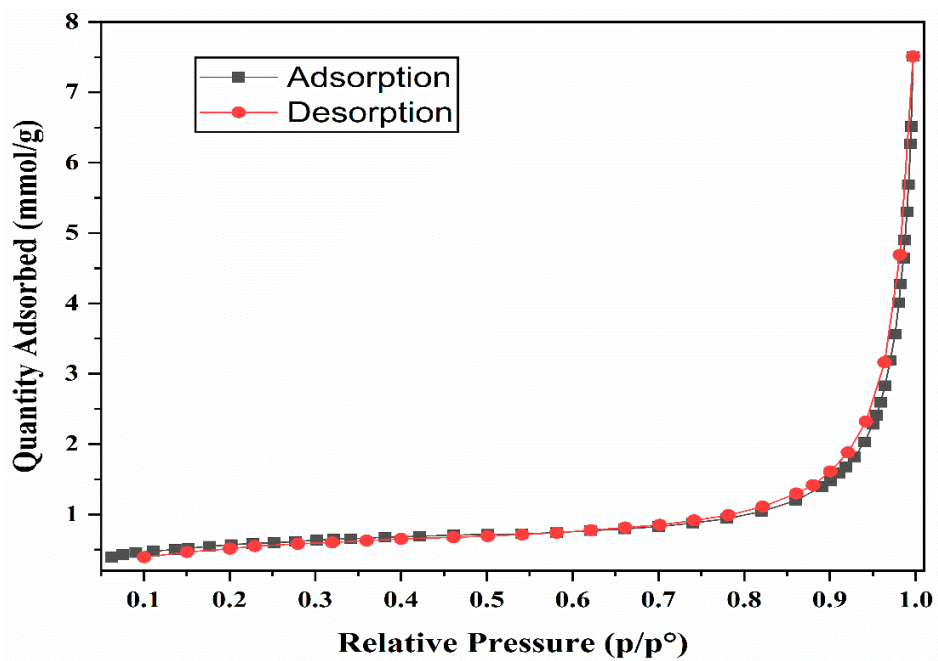

Figure S4.

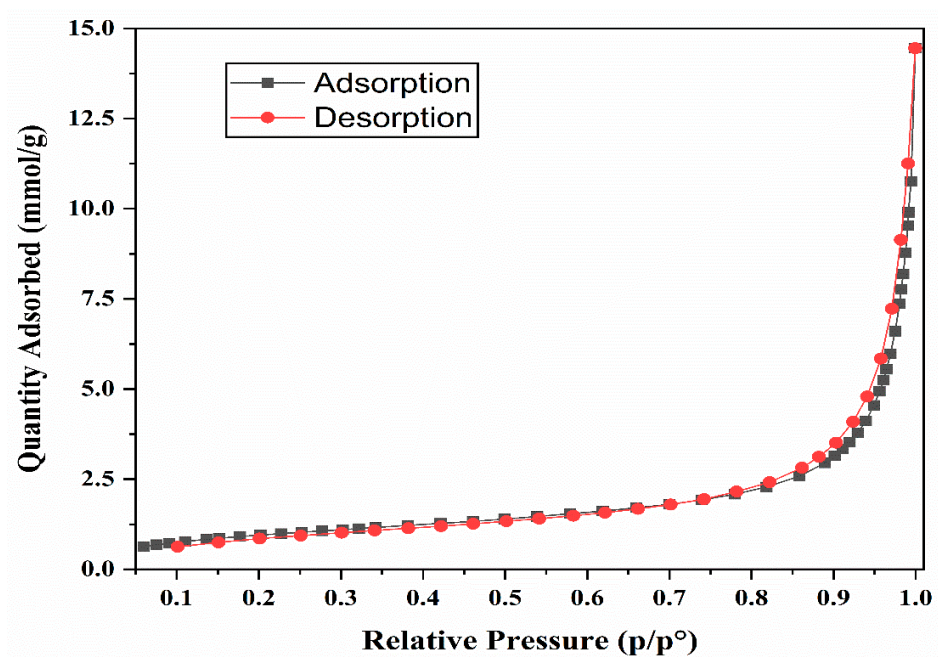

Figure S5.

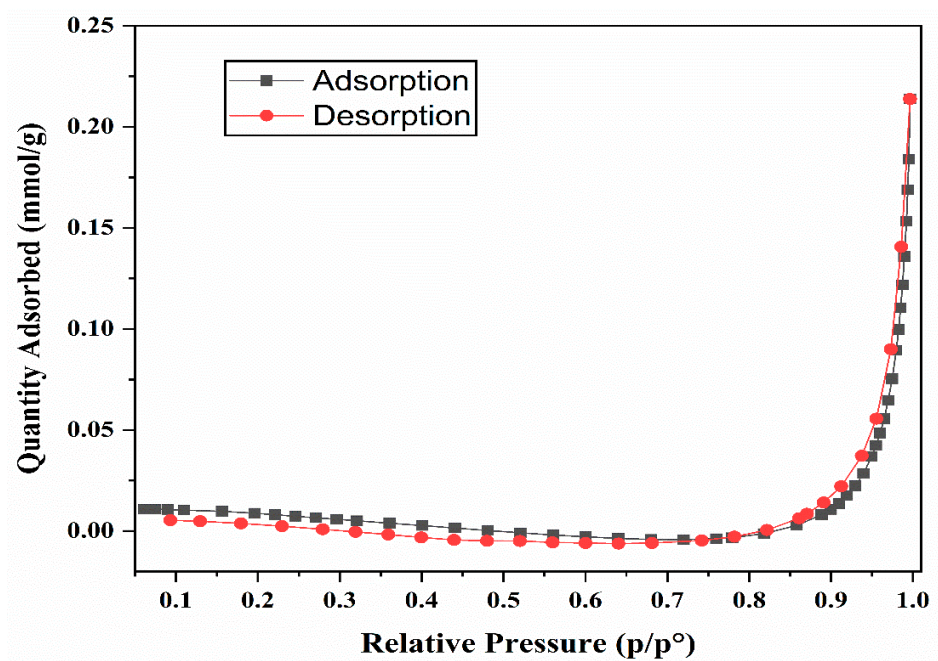

Figure S6.

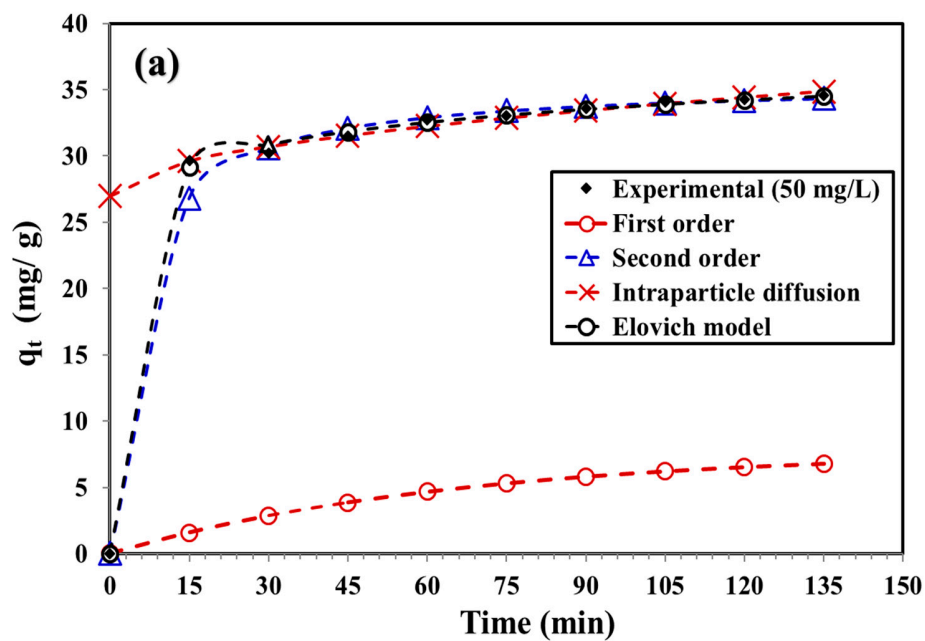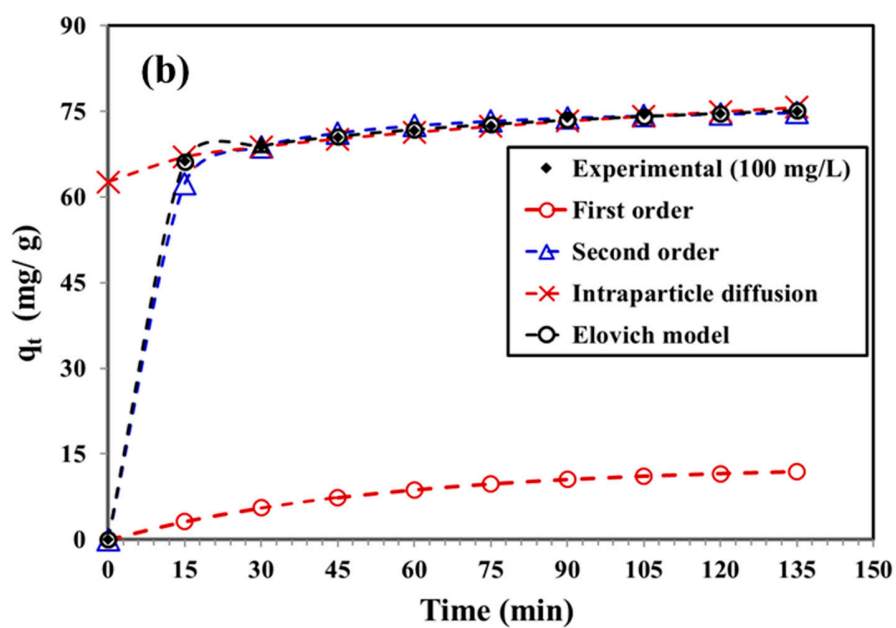

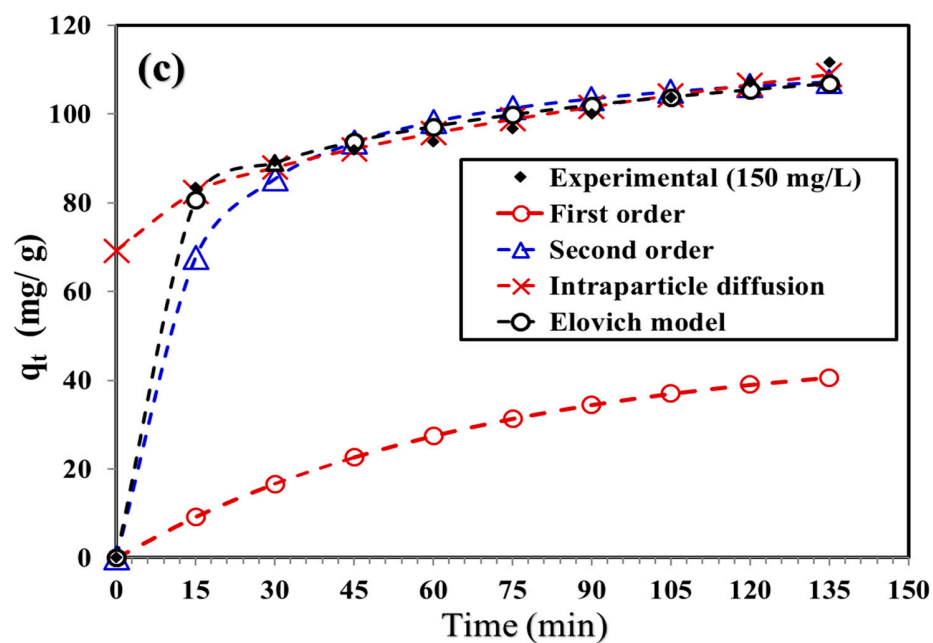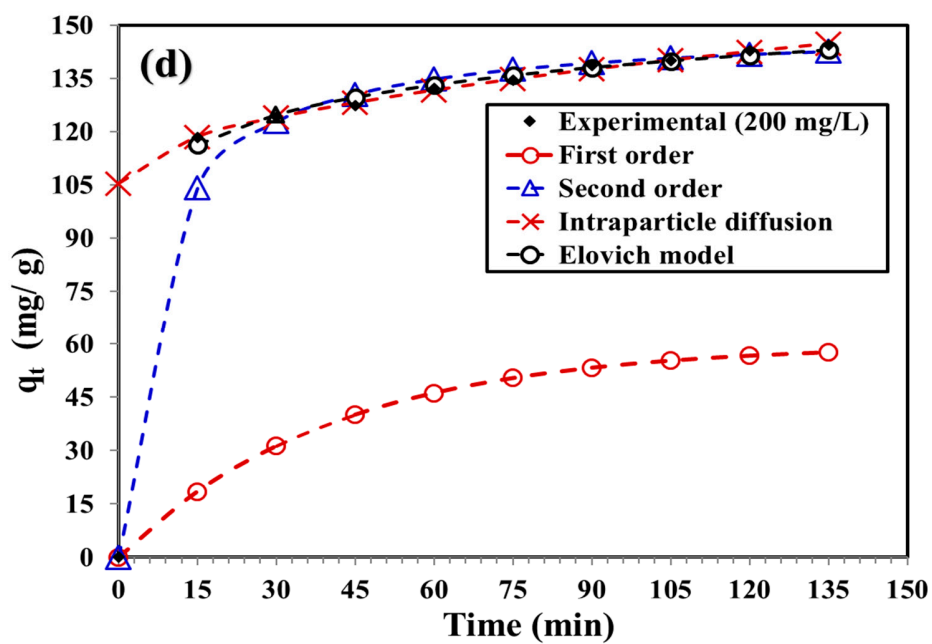

Figure S7 (a-d).

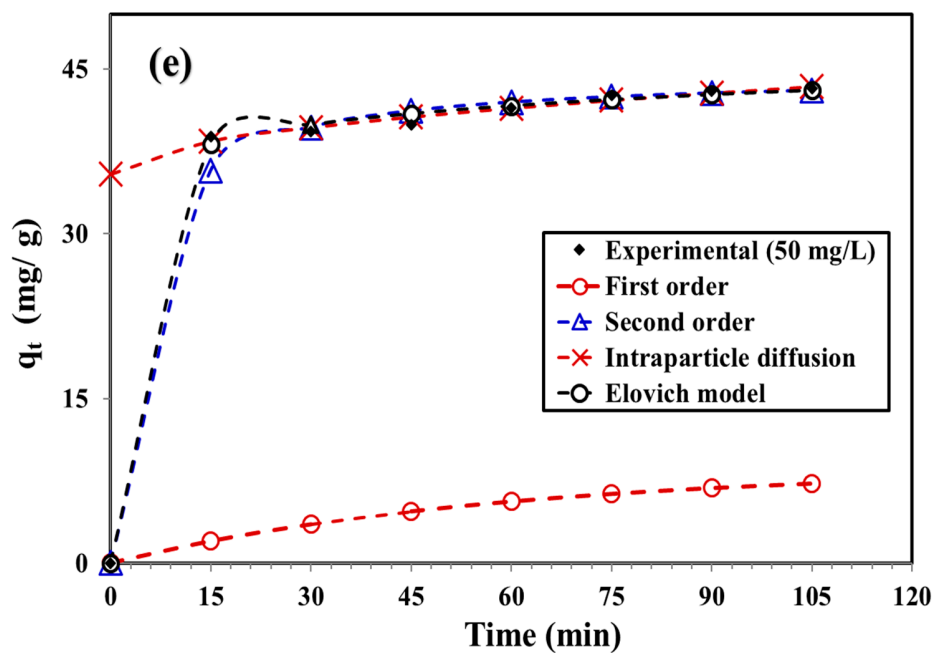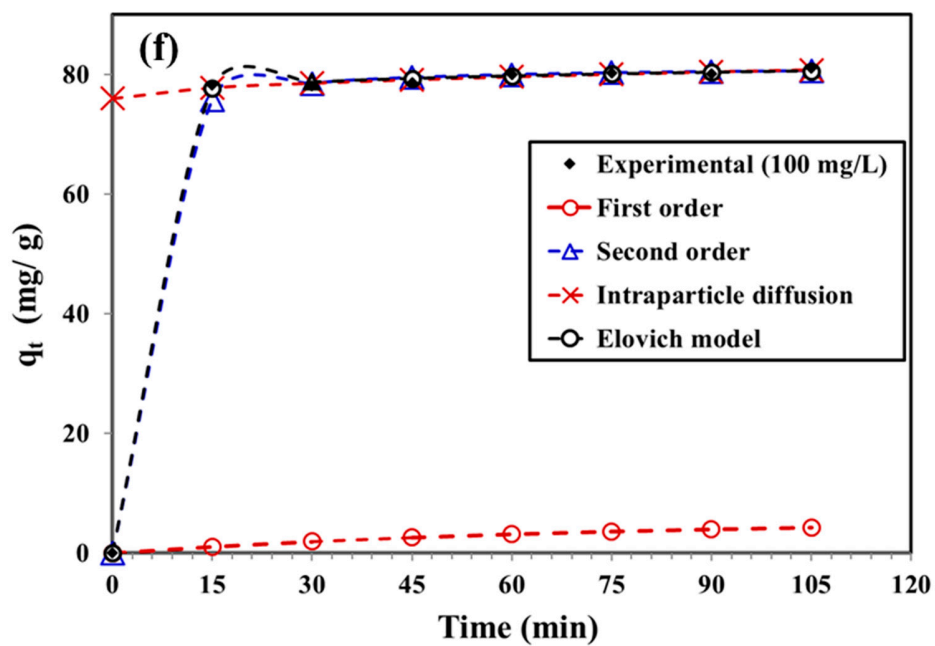



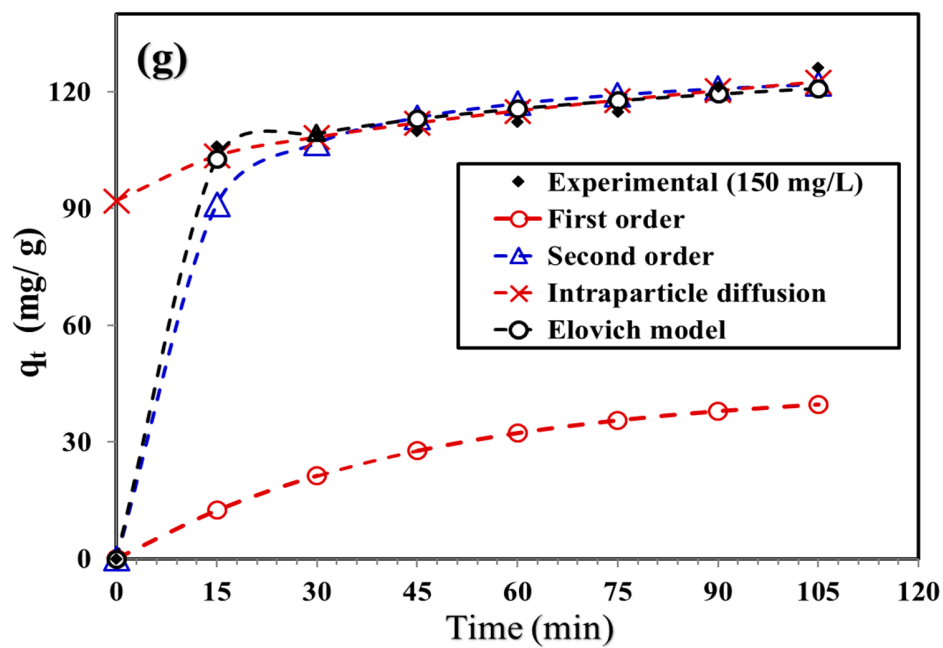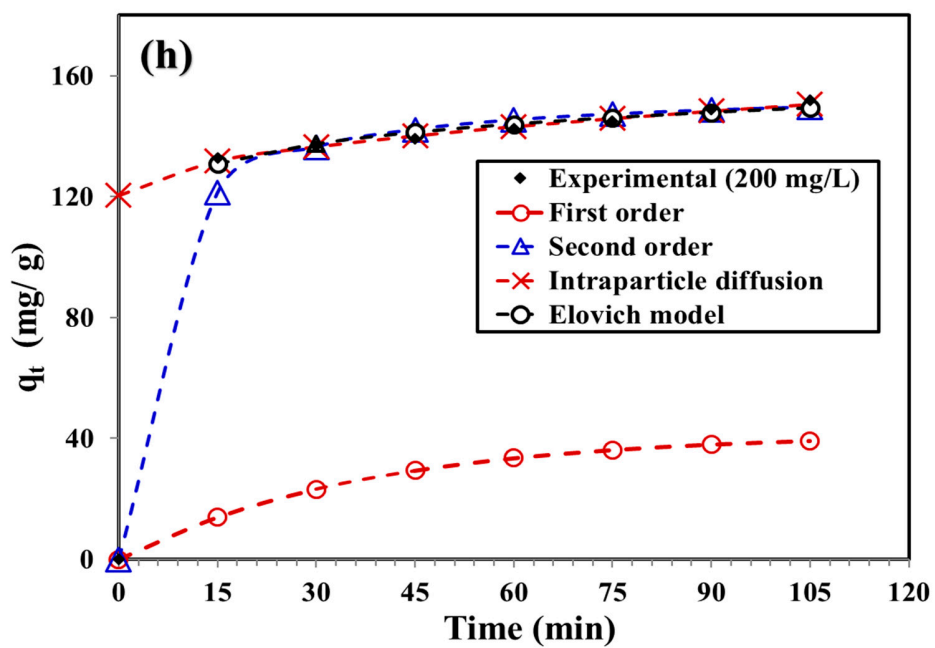

Figure S8 (e-h).

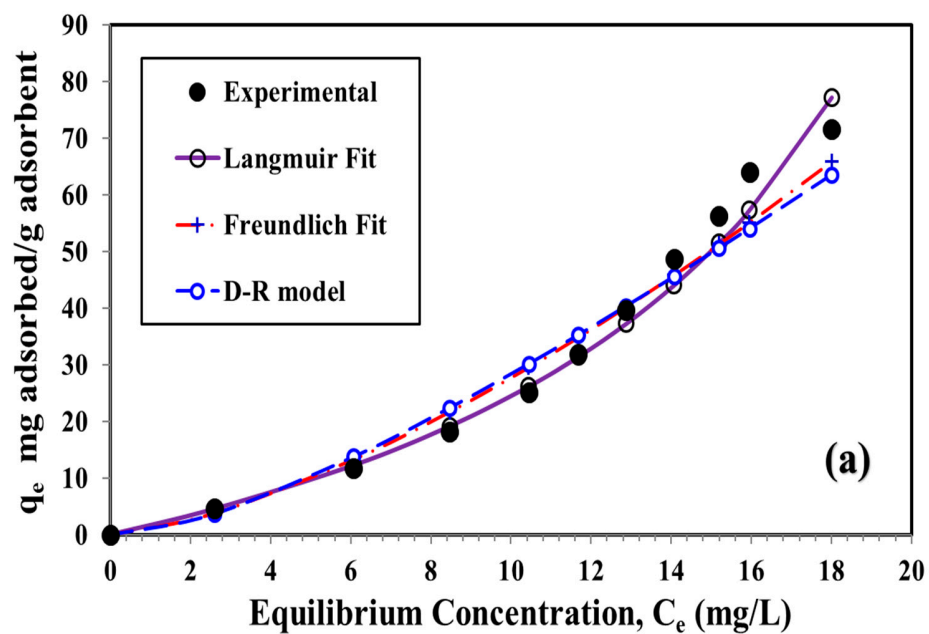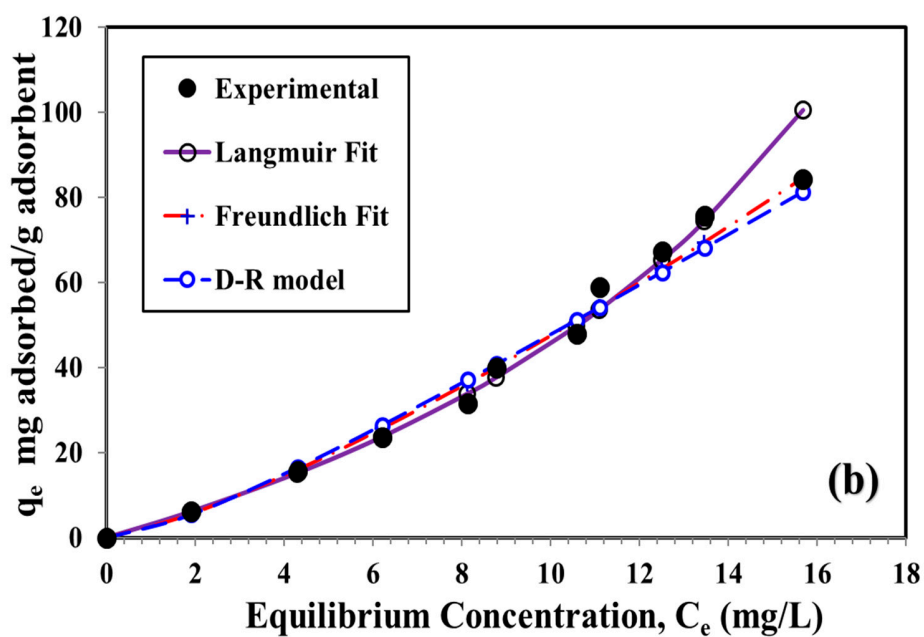

Figure S9 (a-b).
